# Supplementary material
Source: publisher site journal article supplement (https://www.kjim.org/upload/media/kjim-2019-279-suppl.pdf)
Supplement: Supplementary file 1 [file kjim-2019-279-suppl.pdf]

**Supplementary Table 1. Characteristic of included patients stratified by sex**

| Characteristic                        | Male (n = 75)  | Female (n = 41) | p value            |
|---------------------------------------|----------------|-----------------|--------------------|
| Age, yr                               | 34.37 ± 15.08  | 33.44 ± 14.67   | 0.748              |
| Body weight at time of initiation, kg | 60.6 ± 13.1    | 49.5 ± 8.2      | 0.000 <sup>a</sup> |
| IBD type                              |                |                 | 0.607              |
| Crohn's disease                       | 50 (66.6)      | 30 (73.17)      |                    |
| Ulcerative colitis                    | 25 (33.3)      | 11 (26.8)       |                    |
| Anti-TNF treatment duration           | 170.57 ± 92.73 | 137.80 ± 80.49  | 0.059              |
| Anti-TNF type                         |                |                 | 0.171              |
| Infliximab                            | 58 (77.3)      | 37 (90.2)       |                    |
| Adalimumab                            | 14 (18.7)      | 4 (9.8)         |                    |
| Golimumab                             | 3 (4.0)        | 0               |                    |
| Combination therapy                   | 39 (52.0)      | 16 (39.0)       | 0.253              |
| Immunomodulator type                  |                |                 | 0.057              |
| Azathioprine                          | 32 (82.1)      | 10 (62.5)       |                    |
| 6-Mercaptopurine                      | 7 (17.9)       | 4 (25.0)        |                    |
| Methotrexate                          | 0              | 2 (12.5)        |                    |
| History of abdominal surgery          | 7 (9.3)        | 2 (4.9)         | 0.621              |
| Steroid exposure                      | 69 (98.6)      | 41 (100)        | 1.000              |
| Anti-TNF discontinuation              | 15 (20.0)      | 20 (48.8)       | 0.004 <sup>a</sup> |
| Loss of response                      | 14 (18.7)      | 17 (41.5)       |                    |
| Adverse events                        | 1 (1.3)        | 3 (7.3)         |                    |

Values are presented as mean ± SD or number (%).

IBD, inflammatory bowel disease; TNF, tumor necrosis factor.

<sup>a</sup>p < 0.05.
